1 **Title**

2 An Age-Specific Atlas for Delineation of White Matter Pathways in Children

3 Aged 6-8 Years

4 **Author names and affiliations**

5 Arthur Spencer<sup>a\*</sup>, Hollie Byrne<sup>a</sup>, Richard Lee-Kelland<sup>b</sup>, Sally Jary<sup>b</sup>, Marianne Thoresen<sup>b,c</sup>, Frances  
6 Cowan<sup>b,d</sup>, Ela Chakkarapani<sup>b</sup>, Jonathan C.W. Brooks<sup>a,c</sup>.

7 <sup>a</sup>Clinical Research and Imaging Centre, University of Bristol, Bristol, UK

8 <sup>b</sup>Faculty of Health Sciences, Translational Health Sciences, Bristol Medical School, University of  
9 Bristol, Bristol, UK

10 <sup>c</sup>Faculty of Medicine, Institute of Basic Medical Sciences, University of Oslo, Oslo, Norway

11 <sup>d</sup>Department of Paediatrics, Imperial College London, London, UK

12 <sup>e</sup>School of Psychological Science, University of Bristol, Bristol, UK

13 \*Corresponding author; arthur.spencer@bristol.ac.uk; Clinical Research and Imaging Centre,  
14 University of Bristol, 60 St Michael's Hill, Bristol, BS2 8DX

15 **Declarations of interest:** none

16 **CRedit authorship contribution statement:**

17 Arthur Spencer: Conceptualisation; data curation; formal analysis; methodology; software; validation;  
18 visualisation; writing – original draft.

19 Hollie Byrne: Data curation; investigation.

20 Richard Lee-Kelland: Data curation; investigation.

21 Sally Jary: Investigation.

22 Marianne Thoresen: Investigation.

23 Frances Cowan: Investigation.

24 Ela Chakkarapani: Funding acquisition; methodology; project administration; resources; supervision;  
25 validation; writing – review & editing.

26 Jonathan Brooks: Methodology; resources; supervision; validation; writing – review & editing.

## 27 **Abstract**

28 Diffusion MRI allows non-invasive assessment of white matter maturation in typical development and  
29 of white matter damage due to brain injury or pathology. Reliably attributing diffusion metrics to  
30 specific white matter pathways either requires use of lengthy acquisition protocols with numerous  
31 diffusion directions, which may be problematic in certain cohorts (e.g. children or adults with mild  
32 cognitive impairment), or probabilistic white matter atlases, which allow delineation of white matter  
33 tracts without the need to perform tractography, thus eliminating the need for the extensive scans  
34 required for modern tractography algorithms. However, given the known age-dependency of  
35 developmental change in white matter it may not be optimal to use an adult template when assessing  
36 data acquired from children.

37 This study develops an age-specific probabilistic white matter atlas for delineation of 12 major white  
38 matter tracts in children aged 6-8 years. By comparing to fibre tracking in individuals, we  
39 demonstrate that this age-specific atlas gives better overall performance than simply registering to the  
40 Johns Hopkins University (JHU) adult white matter template in both data acquired from a single  
41 cohort on a single scanner (age-specific  $r = 0.72$ ; JHU  $r = 0.54$ ) and from a cohort taken from the  
42 ABIDE dataset (age-specific  $r = 0.75$ ; JHU  $r = 0.72$ ). Accuracy was assessed by comparing estimates  
43 of tract-level diffusion metrics, using the age-specific and adult templates, to results of subject-  
44 specific tracing. To our knowledge, this is the first publicly available probabilistic atlas of white  
45 matter tracts for this age group.

46 We then use the age-specific atlas to provide evidence for reduced fractional anisotropy in several  
47 tracts in children who were treated with therapeutic hypothermia for neonatal encephalopathy at birth  
48 and did not have cerebral palsy, compared with controls matched for age, sex and socio-economic  
49 status.

## 50 **Keywords**

51 White matter, Development, Atlas, dMRI, Tractography.

## 52 **Abbreviations**

53 DWI – diffusion-weighted imaging; FA – fractional anisotropy; NE – neonatal encephalopathy; TH –  
54 therapeutic hypothermia.

## 55 **1 Introduction**

56 Tract-level analysis of diffusion weighted imaging (DWI) data is used extensively to investigate white  
57 matter microstructure in both typical (Asato et al., 2010; Hüppi and Dubois, 2006; Lebel et al., 2008)  
58 and atypical brain development (for a review, see (Dennis and Thompson, 2013)). In children and  
59 adolescents, atypical brain development may lead to physical and intellectual disabilities including  
60 e.g. cerebral palsy (CP) (Arrigoni et al., 2016), autistic spectrum behaviours (Ameis and Catani, 2015;  
61 Dimond et al., 2019) and attention deficit hyperactivity disorder (Konrad and Eickhoff, 2010).

62 A widely employed technique to delineate white matter tracts is to segment streamlines generated by  
63 tractography (Lawes et al., 2008; Sydnor et al., 2018; Wakana et al., 2007; Wassermann et al., 2010;  
64 Zhang et al., 2018), however acquiring accurate tractography requires lengthy scanning protocols (i.e.  
65 HARDI) which are susceptible to head motion. Extended scan times can be problematic for some  
66 children, especially those with disabilities who would benefit from investigating white matter  
67 development (Phan et al., 2018).

68 Where long scans pose difficulty, shorter sequences can still provide the data required to construct  
69 diffusion tensors. Though not optimal, the tensor model offers insight into white matter  
70 microstructure by calculating metrics such as fractional anisotropy (FA), mean diffusivity (MD),  
71 radial diffusivity (RD) and axial diffusivity (AD) (Assaf and Pasternak, 2008). These metrics are  
72 sensitive to changes in the underlying white matter structure, thus are widely investigated in brain  
73 development (Dennis and Thompson, 2013; Lebel et al., 2008), as well as having clinical relevance in  
74 patient cohorts (Assaf et al., 2019; Assaf and Pasternak, 2008; Horsfield and Jones, 2002). Lacking  
75 the high angular resolution data required for tractography, white matter tracts can be delineated by  
76 registering to a standard template with a probabilistic atlas of tract locations. However, the widely  
77 used Johns Hopkins University (JHU) atlas (Hua et al., 2008) is constructed from adult data.  
78 Numerous developmental studies demonstrate white matter alterations continuing into adolescence  
79 (Cascio et al., 2007; Hagmann et al., 2010; Lebel et al., 2008; Simmonds et al., 2014), and white  
80 matter development varies widely across the brain (Lebel et al., 2019), therefore an atlas constructed  
81 from adult scans is by design and definition not representative of children. There are several publicly  
82 available age-specific structural templates (Altaye et al., 2008; Fonov et al., 2011; Richards et al.,  
83 2016; Sanchez et al., 2012), however none of these provide diffusion data.

84 Using robust tract reconstruction protocols (Wakana et al., 2007) this study develops an age-specific  
85 probabilistic white matter atlas for 12 major tracts in children aged 6-8 years. To assess whether this  
86 atlas accurately delineates tracts, we measured both volumetric overlap and the diffusion metrics  
87 sampled by the tract mask in comparison with tractography-based tract delineation. We then assess

88 the utility of this age-specific tract atlas by comparing it to results obtained using an adult atlas (JHU).  
89 The atlas is then further validated against an open data source (i.e. different scanner), and against a  
90 different tractography algorithm.

91 As a demonstration of proof of concept, we then investigate tract-level differences in children treated  
92 with therapeutic hypothermia (TH) for neonatal encephalopathy (NE) at birth, compared with healthy  
93 controls, and compare results obtained using the age-specific atlas to those from the JHU atlas. The  
94 children who had TH, do not have CP and are in mainstream education still exhibit significantly  
95 reduced performance on cognitive tests (Jary et al., 2019; Lee-Kelland et al., 2020) and have slower  
96 reaction times and reduced visuo-spatial processing abilities (Tonks et al., 2019), compared to the  
97 healthy controls.

98 This age-specific atlas provides a method of delineating white matter tracts in children without  
99 tractography, thus lending itself to clinical settings, application to large datasets, and research studies  
100 involving cohorts who may be averse to long scan times.

## 101 **2 Material and Methods**

### 102 **2.1 Participants**

103 Ethics approval was obtained from the North Bristol Research Ethics Committee and the Health  
104 Research Authority (REC ID: 15/SW/0148). Informed and written consent was obtained from the  
105 parents of participants before collecting data. The cohort was made up of 36 healthy children aged 6-8  
106 years with no evidence of neurological disease, originally recruited as controls for a study of the long-  
107 term effects of TH (“CoolMRI”) on behavioural and imaging outcomes. The 36 controls were split  
108 randomly into 28 atlas and 8 validation subjects such that the group were matched for age, sex, socio-  
109 economic status (SES) and full-scale intelligence quotient (FSIQ). For the demonstrative case study,  
110 data from 33 children treated with TH following NE at birth were compared to the control data.  
111 Participant demographics are shown in Section 3.1.

### 112 **2.2 Image Acquisition**

113 DWI data were acquired with a Siemens 3 Tesla Magnetom Skyra MRI scanner at the Clinical  
114 Research and Imaging Centre (CRiCBristol), Bristol, UK. Subjects were placed supine within the 32-  
115 channel receive only head-coil by an experienced radiographer, and head movement minimised by  
116 means of memory-foam padding. Children wore earplugs and were able to watch a film. A parent was  
117 only allowed in the room in exceptional circumstances (i.e. if the child was very nervous). A  
118 multiband echo-planar imaging (EPI) sequence was used with the following parameters: TE = 70 ms;

119 TR = 3150 ms; field of view  $192 \times 192$  mm; 60 slices; 2.0 mm isotropic voxels; phase encoding in the  
120 anterior-posterior direction, in-plane acceleration factor = 2 (GRAPPA (Griswold et al., 2002)),  
121 through-plane multi-band factor = 2 (Moeller et al., 2010; Setsompop et al., 2012b, 2012a).

122 For the purpose of data averaging and eddy-current distortion correction, two sets of diffusion  
123 weighted images were acquired with  $b = 1,000$  s  $\text{mm}^{-2}$  in 60 diffusion directions, equally distributed  
124 according to an electrostatic repulsion model, as well as 8 interspersed  $b = 0$  images, with one data set  
125 acquired with positive phase encoding steps, then repeated with negative steps (so-called, “blip-up”,  
126 “blip-down”), giving a total of 136 images.

### 127 **2.3 Quality Control**

128 The quality of the diffusion data was assessed using the EddyQC tool (Bastiani et al., 2019) from FSL  
129 (Smith et al., 2004). This provides several measures of the amount of movement and eddy current  
130 induced distortion present in the data. For each participant, the root-mean-square of all metrics was  
131 calculated, giving a score which increases monotonically with the amount of movement and eddy  
132 current distortion. Scans were rejected if their score was more than one standard deviation above the  
133 mean of all participants.

### 134 **2.4 Image Processing & Atlas Construction**

135 DWI data were denoised and corrected for eddy current induced distortions and subject movements  
136 using EDDY (Andersson and Sotiropoulos, 2016) and TOPUP (Andersson et al., 2003), part of FSL.  
137 Subsequent DWI processing and tractography steps were performed using MRtrix (Tournier et al.,  
138 2019). The response function (the DWI signal for a typical fibre population) was estimated from the  
139 data (Tournier et al., 2013). The fibre orientation distribution (FOD) was then calculated by  
140 performing constrained spherical deconvolution of the response function from the measured DWI  
141 signal (Tournier et al., 2007). Deterministic tractography was run in each subject using the “SD  
142 Stream” algorithm (Tournier et al., 2012). Streamlines were seeded randomly in the brain and  
143 generated with a step size of 0.2 mm, then terminated if the FOD amplitude dropped below 0.2 or the  
144 angle between successive steps exceeded 40 degrees. 10 million streamlines were generated, which  
145 were then filtered to 1 million using spherical-deconvolution informed filtering of tractograms (SIFT)  
146 (Smith et al., 2013) to give better reconstruction of FODs, improving anatomical accuracy.

147 The process of generating probability maps from the whole-brain tractograms is summarised in Figure  
148 1. White matter tracts were segmented from whole-brain tractograms using the protocols described in  
149 (Wakana et al., 2007), whereby regions of interest (ROI) are drawn to include or exclude streamlines  
150 passing through them. For a given tract, any streamlines which pass through all inclusion ROIs and no

151 exclusion ROIs belong to that tract, and all other streamlines are removed. Inclusion and exclusion  
152 ROIs were manually drawn in each subject to delineate 12 major fibre tracts: anterior thalamic  
153 radiation (ATR); cingulate gyrus part of the cingulum (CG); hippocampal part of the cingulum (CH);  
154 cortico-spinal tract (CST); forceps major (Fmajor); forceps minor (Fminor); inferior fronto-occipital  
155 fasciculus (IFOF); inferior longitudinal fasciculus (ILF); superior longitudinal fasciculus (SLF);  
156 temporal part of the superior longitudinal fasciculus (SLFt); uncinate fasciculus (UF); and the fornix.  
157 The locations of ROIs for all tracts apart from the fornix are described in (Wakana et al., 2007), as  
158 shown in Figure 2.

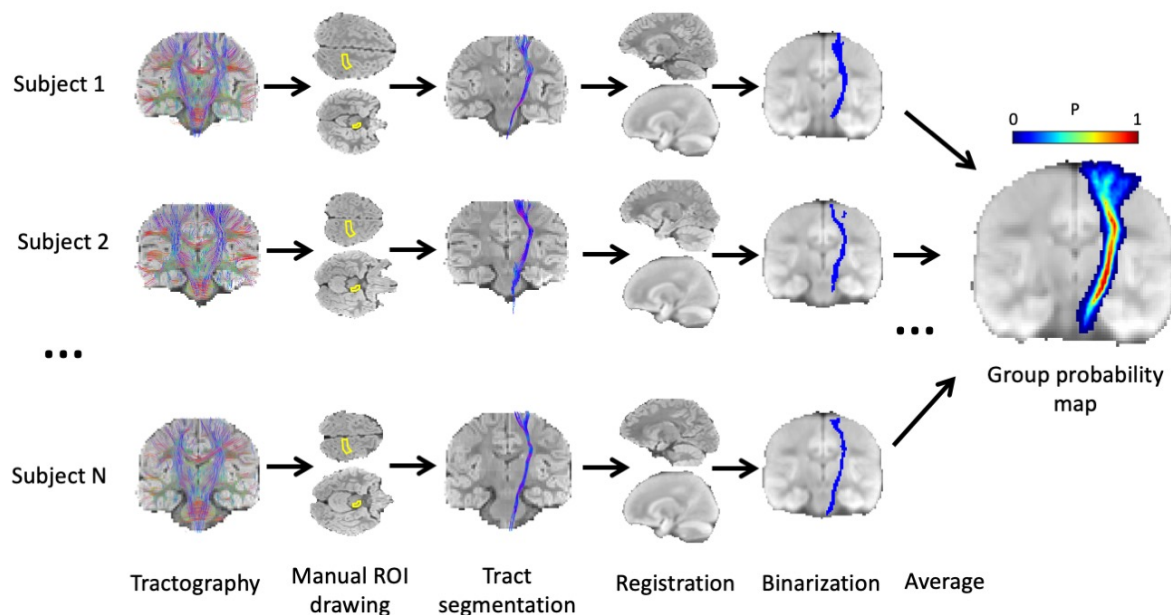

160 **Figure 1:** Methodology for generating probabilistic tract maps from whole-brain tractography data,  
161 shown here for the corticospinal tract (CST). ROIs were manually drawn in each subject, as defined  
162 by (Wakana et al., 2007) (in the case of the CST, inclusion ROIs were drawn in the cerebral peduncle  
163 and the primary motor cortex), and tracts were segmented by including streamlines passing through  
164 the inclusion ROIs. Streamlines were transformed to standard space (JHU template) and a binary  
165 mask was created for each subject indicating all voxels containing streamlines. The average of these  
166 masks (across  $N = 28$  subjects) gives the probability map.

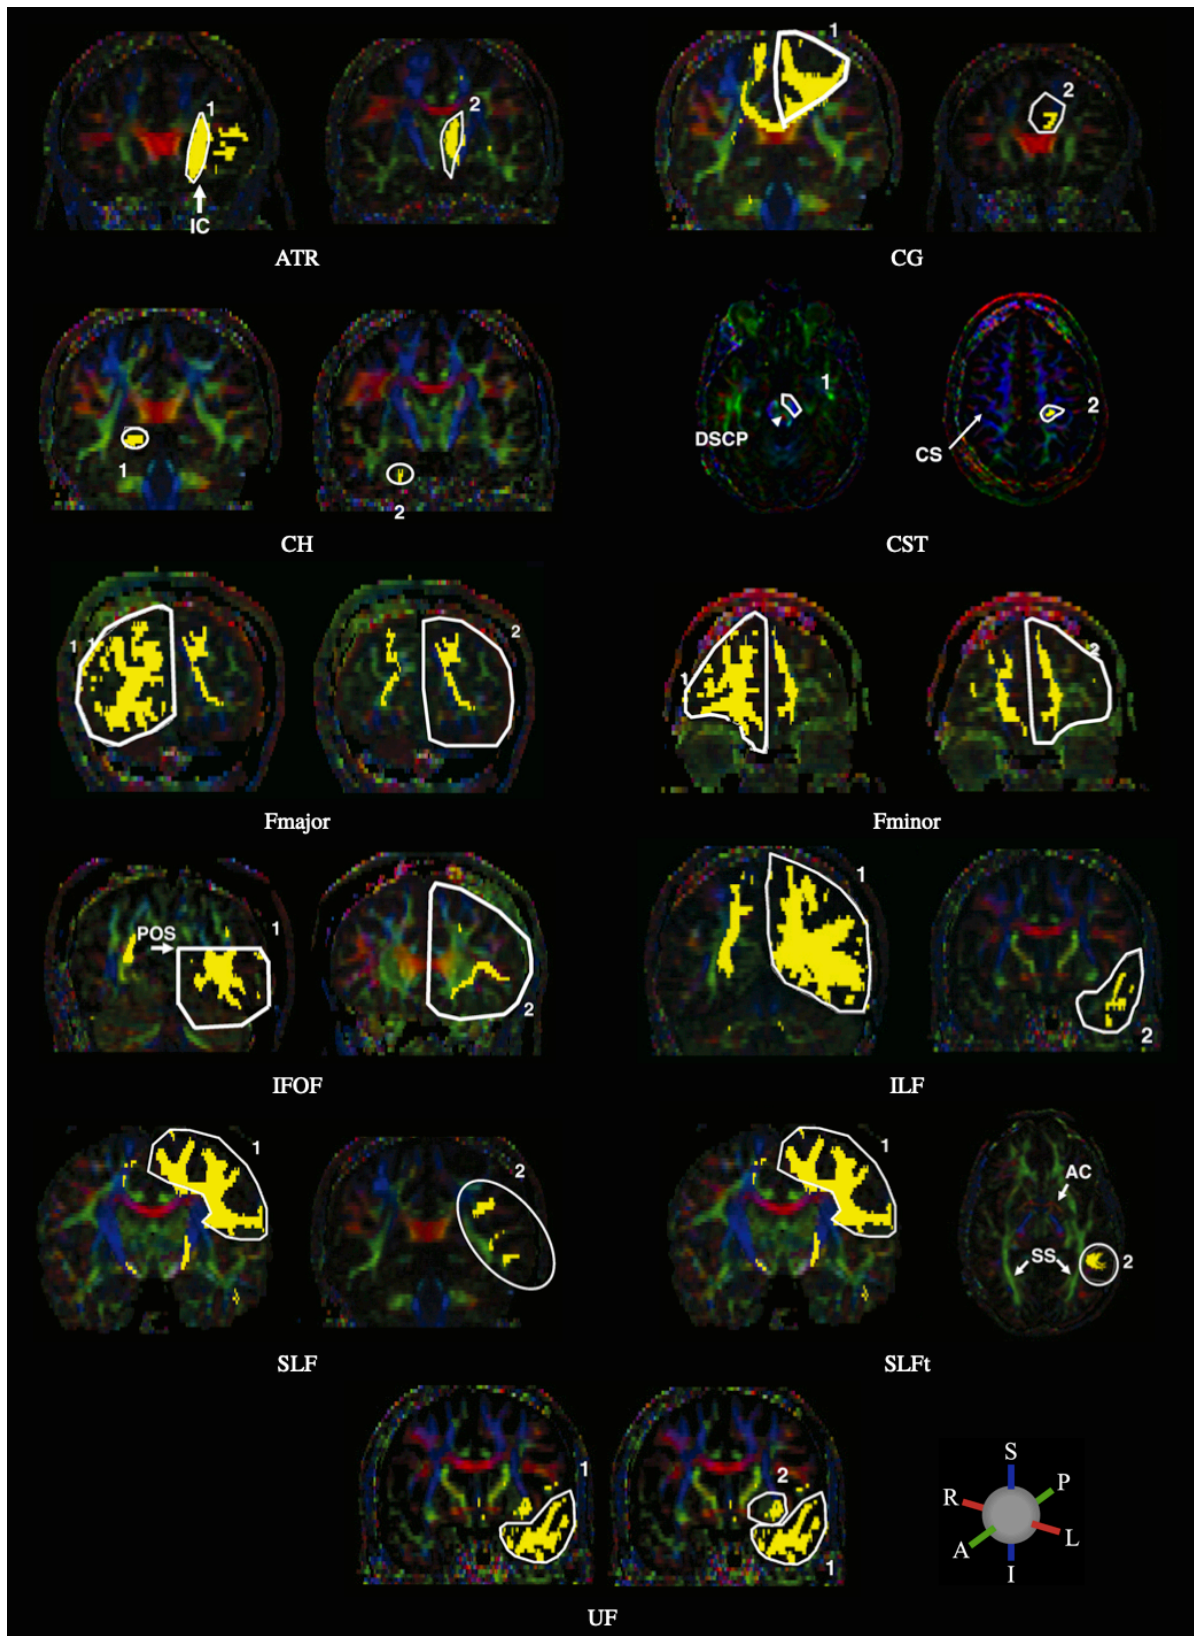

167

168 **Figure 2:** ROIs used to delineate the following major white matter tracts: anterior thalamic radiation  
169 (ATR); cingulate gyrus part of the cingulum (CG); hippocampal part of the cingulum (CH); cortico-  
170 spinal tract (CST); forceps major (Fmajor); forceps minor (Fminor); inferior fronto-occipital

171 fasciculus (IFOF); inferior longitudinal fasciculus (ILF); superior longitudinal fasciculus (SLF);  
172 temporal part of the superior longitudinal fasciculus (SLFt); uncinete fasciculus (UF). Streamlines are  
173 included in a given tract if they pass through both 1 AND 2. The following abbreviations indicate  
174 anatomical landmarks used to draw the ROIs: internal capsule (IC); decussation of the superior  
175 cerebellar peduncle (DSCP); central sulcus (CS); parieto-occipital sulcus (POS); anterior commissure  
176 (AC); sagittal stratum (SS). ROIs are drawn in white with streamlines in yellow, overlaid on FA  
177 images with principal diffusion directions indicated by the colour ball; blue = superior-inferior (S-I),  
178 green = anterior-posterior (A-P) and red = right-left (L-R). Adapted from (Wakana et al., 2007) with  
179 permission from Elsevier.

180 To delineate the fornix, streamlines were included which pass through the body of the fornix and  
181 either of the posterior limbs which project to the hippocampus (Figure 3). These were isolated by first  
182 selecting an axial level at the lower edge of the splenium of the corpus callosum, as seen in the mid-  
183 sagittal plane (Figure 3, left); in this axial level, the first ROI was drawn around the body of the  
184 fornix. Viewing the streamlines which are delineated by the first ROI, additional bilateral ROIs were  
185 defined to include only those which project posteriorly from the fornix body (Figure 3, right).

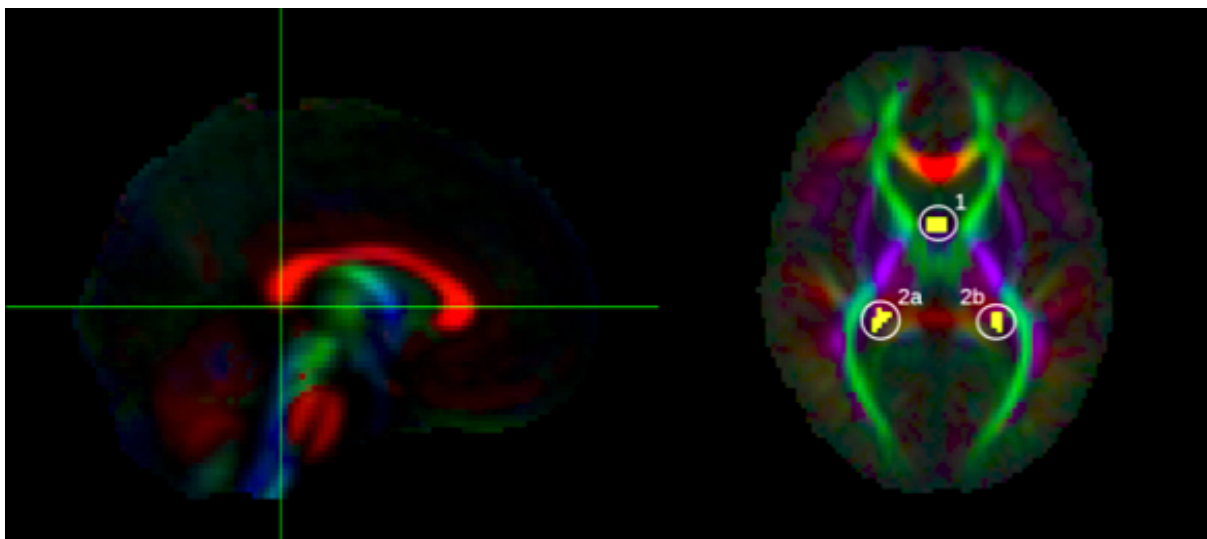

186

187 **Figure 3:** ROIs used to delineate the fornix, shown here on the group FA template. Yellow voxels  
188 contain streamlines which pass through the body of the fornix (1) AND bilateral posterior limbs of  
189 fornix (2a OR 2b).

190 For spatial normalisation, the average diffusion weighted image (aDWI), created for each subject by  
191 averaging all DWI images, was registered to the JHU aDWI template by 12-degree of freedom affine  
192 registration using FSL's FLIRT (Jenkinson et al., 2002). The resulting transformation was then  
193 applied to the segmented streamlines. Any voxel containing one or more of these streamlines was then  
194 labelled, to create a binary mask for the tract for each individual. The average, across 28 subjects, of



195 these binary masks was taken to give a probability map for each tract. The aDWI was then created for  
196 the group by averaging transformed aDWIs from all 28 subjects, and the group FA image was created  
197 from the group-average tensor map.

198 This atlas is available at Neurovault (<https://neurovault.org/collections/LWTAAAST/>)<sup>1</sup>. Data is  
199 available upon request to the corresponding author.

## 200 **2.5 Validation**

201 Two datasets were used for validation. The first was made up of 8 subjects drawn randomly from the  
202 36 control participants from CoolMRI. These subjects were scanned using the same scanner and  
203 scanning parameters as the remaining 28 subjects used in construction of the atlas. Subject specific  
204 tracts were traced in these individuals using the method described in Section 2.4.

205 The second validation dataset comprises data obtained from the Autism Brain Imaging Data  
206 Exchange II<sup>2</sup> (ABIDE) database (Di Martino et al., 2017), available online as part of the International  
207 Neuroimaging Data Sharing Initiative. This allows validation using subjects scanned in a different  
208 scanner, and with different scanning parameters, in order to alleviate any bias associated with same-  
209 site scans. Scans were obtained from 7 subjects, aged 8-9 years. Both typical controls (n = 3) and  
210 subjects with autism spectrum disorder (n = 4) were used. Due to data availability the age range of  
211 these subjects extends slightly above that of the atlas, however it serves as a test of how well the atlas  
212 generalises. These images were acquired on a GE 3T MR750 scanner with an 8-channel head coil  
213 using an echo-planar pulse sequence with the following parameters: TE = 84.9 ms; TR = 8500 ms;  
214 FoV = 240 mm; 128 x 128 matrix; 68 slices; 1.88 x 1.88 x 2 mm resolution; 61 diffusion directions  
215 with b = 1,000 s mm<sup>-2</sup>; and one b = 0 image. To remove any further bias resulting from the validation  
216 data being processed with the same tractography algorithm, tracts in the ABIDE subjects were traced  
217 using a deterministic tensor-based algorithm (Basser et al., 2000).

218 After all tracts were traced in every validation subject, they were nonlinearly registered to the group  
219 FA image, constructed from the 28 atlas subjects, using FSL's FNIRT (Andersson et al., 2007). To  
220 compare spatial similarity between normalised data we tested the volumetric overlap between the  
221 probabilistic atlas (age-specific or JHU) and each individually traced tract by measuring the Dice  
222 score (Dice, 1945) over a range of thresholds. The amount of volumetric overlap between the atlas  
223 data and the individually traced tract will depend on both i) the quality of registration of the individual  
224 to the template, and ii) the agreement between the atlas data and the results from tractography in the

---

<sup>1</sup> Currently accessible only via this link. Repository will be made public upon publishing.

<sup>2</sup> [http://fcon\\_1000.projects.nitrc.org/indi/abide/abide\\_II.html](http://fcon_1000.projects.nitrc.org/indi/abide/abide_II.html)

225 individual. Thus, if the template is a closely matched target for registration, and if the underlying  
226 anatomy and diffusion process captured by the atlas is a good match to the validation subjects, we  
227 expect the Dice scores to be high.

228 We then assessed the ability of the atlas to reproduce individually traced DWI metrics by calculating  
229 the mean FA in every slice along the major axis of each tract (coronal slices for tracts which project  
230 anterior/posterior; axial slices for tracts which project dorsal/ventral). In individually traced tracts,  
231 average FA was calculated by taking the mean FA in all masked voxels. In the probabilistic atlas, the  
232 FA was weighted by the probability in each voxel using:

$$FA = \frac{\sum_i FA_i \times P_i}{\sum_i P_i} \quad (1)$$

233 where  $FA_i$  is the FA in voxel  $i$  and  $P_i$  is the probability in voxel  $i$ . The Pearson correlation coefficient  
234 was then calculated between the probabilistic FA and individual FA. The average FA over the whole  
235 tract was also calculated for both probabilistic and individual tracts. The correlation, over all tracts,  
236 between probabilistic and individual measurements was assessed. Bland-Altman plots (Altman and  
237 Bland, 1983) were also constructed to compare the precision and accuracy of whole-tract FA  
238 measured by the atlas with individually traced measurements. The same methods were also applied to  
239 the JHU atlas for comparison.

240 Whole-tract correlation plots and Bland-Altman plots were constructed for the 7 ABIDE subjects to  
241 assess the generalisation of the age-specific atlas. This is a deliberately conservative test due to the  
242 different age range and suboptimal tractography algorithm (see Section 4, Discussion). Validation of  
243 the volumetric overlap and slice-wise correlations for the ABIDE subjects are also provided in the  
244 supplementary materials for completeness.

## 245 **2.6 Case Study**

246 As a demonstration, the age-specific atlas produced here was used to investigate tract-level  
247 differences in white matter microstructure between the case and control children of the CoolMRI  
248 study. In all the tracts delineated by the age-specific atlas, the average FA in the tract was calculated  
249 for each individual using Equation 1. Bilateral tracts were tested separately. Mann-Whitney U tests  
250 were applied to test for differences in the median FA between cases and controls in each tract, with  
251 Bonferroni correction applied to correct for family-wise error. Significant results have corrected  $p <$   
252  $0.05$ . For comparison, the equivalent analysis was performed using the adult-derived JHU atlas. In the  
253 absence of “ground-truth”, only a qualitative comparison of results obtained with the two atlases was  
254 performed.

## 255 3 Results

### 256 3.1 Participant Demographics

257 The CoolMRI study recruited 51 children, without CP, treated with TH for NE at birth and 43 control  
258 children matched for age, sex and SES (Lee-Kelland et al., 2020). Of the recruited children, 7 cases  
259 and 4 controls did not want to undergo scanning. A further 4 cases had incomplete data due to  
260 movement during the scan. Quality control (Section 2.3) led to the rejection of a further 6 cases and 2  
261 controls. One further case and one control were rejected due to incorrect image volume placement.  
262 This left 33 cases and 36 controls. These controls were split into 28 (15 M) for atlas construction and  
263 8 (4 M) for validation. Data for each set of participants is shown in Table 1.

|      | Atlas Data     |                    |        | TH Data        |                   |         |
|------|----------------|--------------------|--------|----------------|-------------------|---------|
|      | Atlas (n = 28) | Validation (n = 8) | p      | Cases (n = 33) | Controls (n = 36) | p       |
| Age  | 7.0 (6.1-7.9)  | 7.0 (6.1-7.8)      | 0.9392 | 6.9 (6.0-7.9)  | 7.0 (6.1-7.9)     | 0.5595  |
| SES  | B (A-D)        | B (A-C1)           | 0.7305 | C1 (A-E)       | B (A-D)           | 0.1568  |
| M/F  | 15/13          | 4/4                | 0.8776 | 18/15          | 19/17             | 0.8894  |
| FSIQ | 108 (75-127)   | 112.5 (88-137)     | 0.3032 | 93 (62-115)    | 108 (75-137)      | <0.0001 |

264 **Table 1:** Demographics of participants in the atlas and validation dataset, and in the TH dataset. Mean  
265 (range) is shown for age; Median (range) is shown for SES and FSIQ. SES is defined as follows: A=  
266 upper middle class, B = middle class, C1 = lower middle class, C2 = skilled working class, D =  
267 working class.

### 268 3.2 Atlas

269 Figure 4 shows the probabilistic map for each tract, as well as the aDWI and FA images for the group  
270 of 28 children.

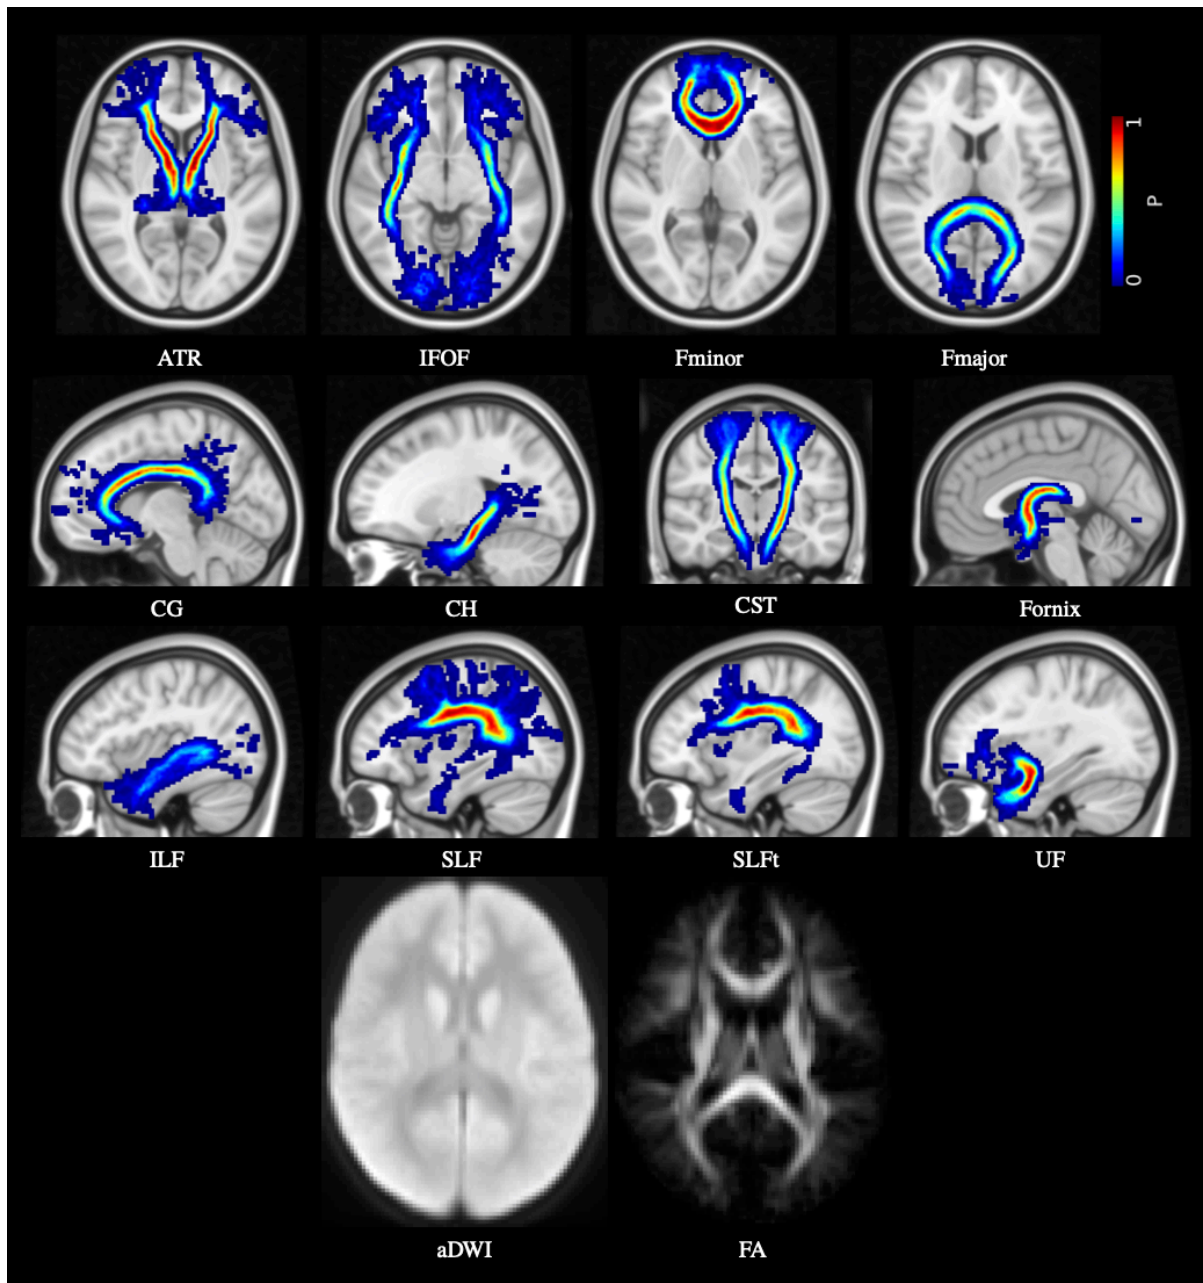

271

272 **Figure 4:** Age-specific probabilistic atlas for the 12 major white matter tracts: anterior thalamic  
273 radiation (ATR); inferior fronto-occipital fasciculus (IFOF); forceps minor (Fminor); forceps major  
274 (Fmajor); cingulate gyrus part of the cingulum (CG); hippocampal part of the cingulum (CH); cortico-  
275 spinal tract (CST); fornix; inferior longitudinal fasciculus (ILF); superior longitudinal fasciculus  
276 (SLF); temporal part of the superior longitudinal fasciculus (SLFt); and uncinata fasciculus (UF).  
277 Probabilities are indicated by the colour bar. Also shown are the aDWI and FA maps.

278

## 279 3.3 Validation

### 280 3.3.1 Volumetric Overlap

281 The Dice score at a range of thresholds is plotted for each tract for the same-site data in Figure 5, and  
282 the ABIDE data in Figure S1. In the same-site validation data, the peak of the median Dice score for  
283 the age-specific atlas is higher than for the JHU atlas in every tract. In the ABIDE data, though the  
284 difference is smaller, the peak of the median Dice score for the age-specific atlas is higher than for the  
285 JHU atlas in all tracts apart from the Fmajor and CST and SLF.

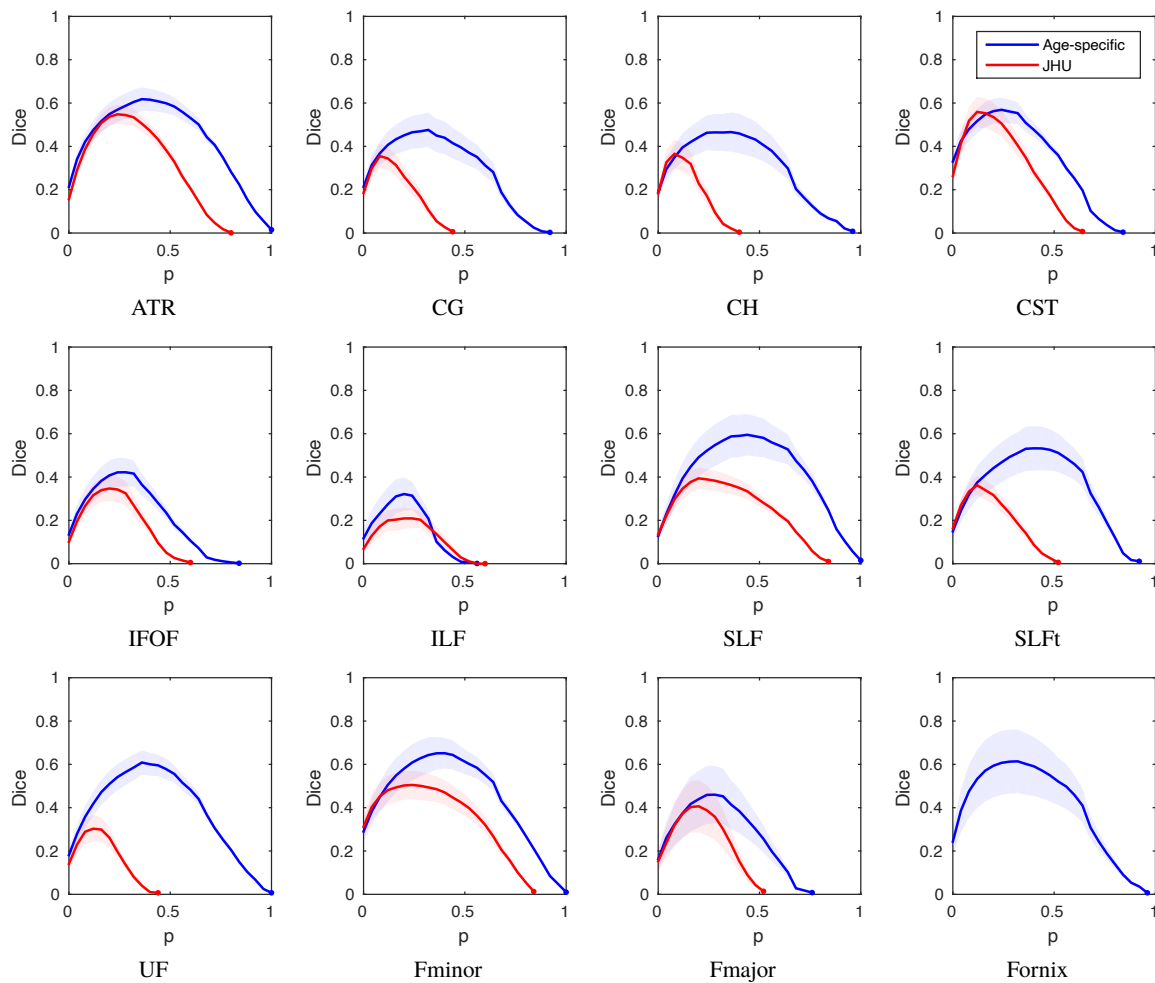

286

287 **Figure 5:** Same-site validation of tract overlap with “gold-standard” subject specific tract tracing.  
288 Plots show the Dice score of volumetric overlap (y axis) against probability threshold (x axis) when  
289 using the age-specific atlas (blue) or the JHU adult atlas (red), plotted up to the threshold at which no  
290 voxels remain. Lines show the median score for the 8 validation subjects not included in the  
291 formation of the atlas, and shaded regions show the 95% confidence interval. Note that the age-  
292 specific atlas (derived from data acquired on the same scanner, but different subjects), outperformed

293 the JHU (adult) atlas in all tracts. The tract representing the fornix is not available in the JHU atlas so  
294 only the new mask was tested.

### 295 **3.3.2 DWI Metrics**

296 The correlation between FA in slices measured by the age-specific atlas and individual tracing is  
297 shown for the same-site validation data in Figure 6, with correlation coefficients given in Table S1  
298 and Figure S2. The correlation for the ABIDE data is shown in Figure S3, with coefficients given in  
299 Table S2 and Figure S4. Better agreement between the “gold-standard” (i.e. individual tract tracing)  
300 and the FA estimated from the different atlases (age-specific or JHU) is reflected by slopes closer to  
301 one, and smaller spread of data around this line. In the same-site data, most tracts show strong  
302 correlation between FA measured by the age-specific atlas and that measured by tracing in the  
303 individual, with all tracts having  $r > 0.8$  apart from the CG ( $r = 0.60$ ), SLF ( $r = 0.50$ ) and SLFt ( $r =$   
304  $0.54$ ). In the ABIDE data, seven of the twelve tracts have  $r > 0.7$ , with the exception of the CG ( $r =$   
305  $0.67$ ), CH ( $r = 0.62$ ), SLF ( $r = 0.66$ ), SLFt ( $r = 0.51$ ) and UF ( $r = 0.69$ ). The age-specific atlas almost  
306 always performs better than the JHU atlas; in the same-site validation, every tract exhibits higher  
307 correlation when delineated with the age-specific atlas than with the JHU atlas, and in the ABIDE  
308 data this is the case for all tracts apart from the SLF (age-specific  $r = 0.66$ ; JHU  $r = 0.70$ ), the IFOF  
309 (for which both atlases give the same correlation,  $r = 0.88$ ) and the CST (for which both atlases give  
310 the same correlation,  $r = 0.89$ ).

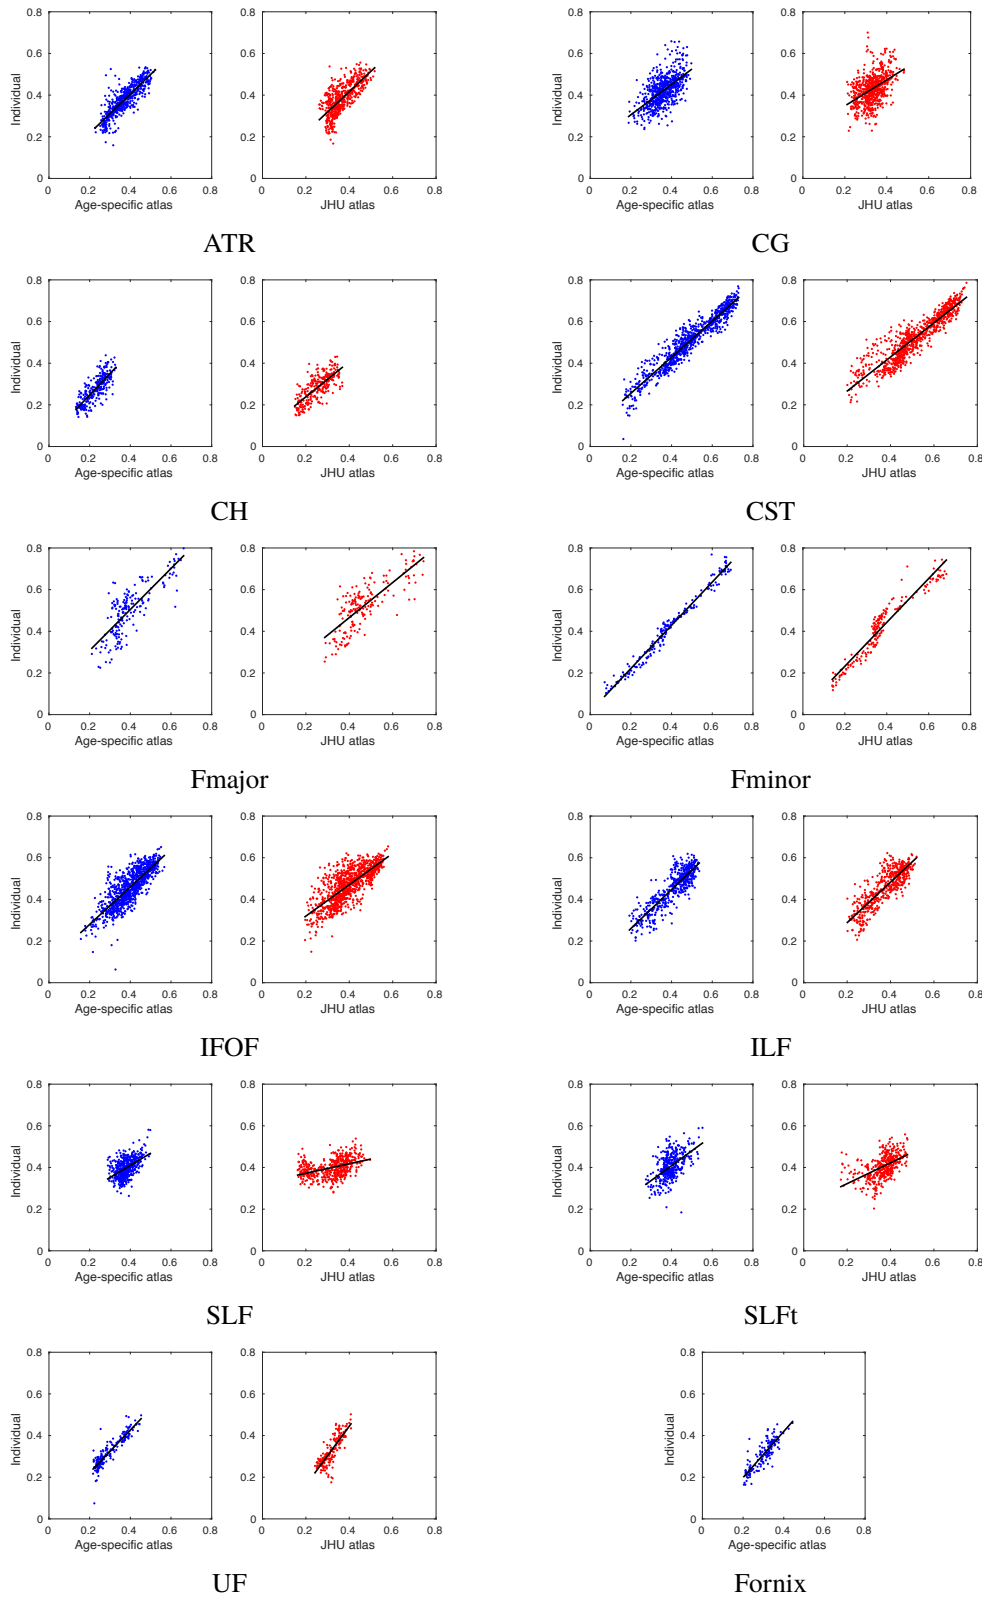

311

312 **Figure 6:** Same-site validation of slice FA values. Plots show slice FA measured from individually  
313 traced tracts (i.e. the "gold-standard") plotted against corresponding values extracted from the age-  
314 specific and JHU atlases. Each plot shows a point for every slice in each of the 8 validation subjects  
315 and the regression.

316 The whole-tract FA measured by the atlas is plotted against that given by tracing in individuals in  
317 Figure 7 and Bland-Altman plots are shown in Figure 8. The fornix is not included in these plots to  
318 allow valid comparison with the JHU atlas. For both the same-site and ABIDE validation data, the  
319 regression to the age-specific atlas measurements has slope closer to unity and intercept closer to zero  
320 than the JHU atlas (see Figure 7). The age-specific atlas also shows stronger correlation than the JHU  
321 atlas for both same-site data (age-specific  $r = 0.72$ ; JHU  $r = 0.54$ ) and ABIDE data (age-specific  $r =$   
322  $0.75$ ; JHU  $r = 0.72$ ). Both the age-specific atlas and the JHU atlas have a positive bias compared to  
323 the individual measurements in the same-site and ABIDE data. Considering the Bland-Altman plots  
324 (Figure 8), the age-specific atlas has narrower limits of agreement (LOA) than the JHU atlas in both  
325 the same-site and ABIDE data.

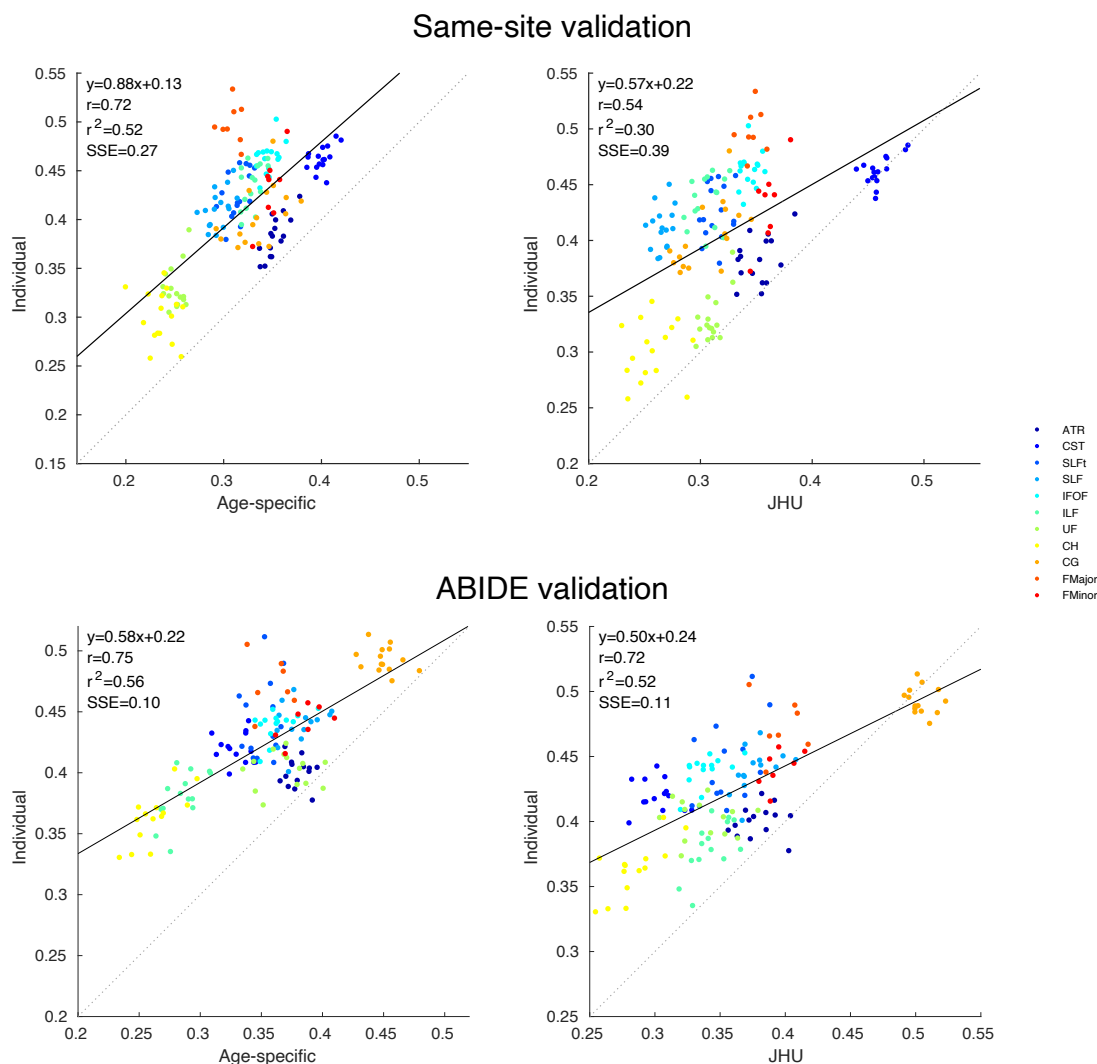

326

327 **Figure 7:** Comparison of mean FA extracted from whole tracts traced in individuals (“gold-  
328 standard”) and that estimated using the age-specific or JHU (adult) atlases. FA in individually traced  
329 tracts is plotted against tract FA measured by the probabilistic atlases for same-site data (top row) and  
330 ABIDE data (bottom row). The solid line shows the regression, and the dotted line represents exact



331 equality between individual and the age-specific or JHU data. Displayed on each plot is the slope and  
 332 intercept equation, the Pearson correlation coefficient,  $r$ , the squared Pearson correlation coefficient,  
 333  $r^2$ , and the sum of squared error (SSE).

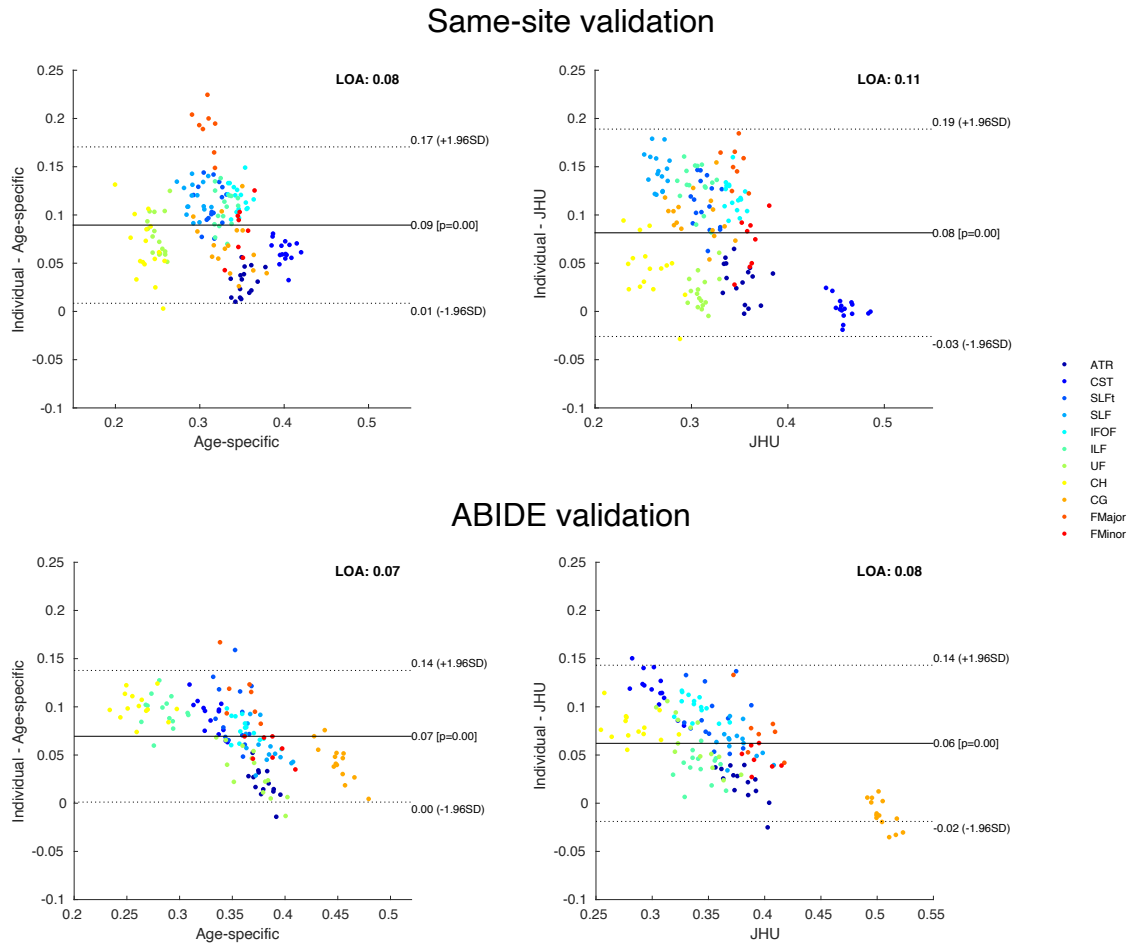

334

335 **Figure 8:** Bland-Altman plots for whole-tract average FA measurements in same-site data (top row)  
 336 and ABIDE data (bottom row), plotted for both the age-specific atlas (left) and JHU atlas (right). The  
 337 limits of agreement (LOA) are shown on each plot.

### 338 3.4 Case Study

339 Numerous tracts in children treated with TH for NE have reduced FA compared to controls (see Table  
 340 S3). After Bonferroni correction, only the left CG ( $p = 0.0056$ ), left CH ( $p = 0.0081$ ), left SLF ( $p =$   
 341  $0.0383$ ), and fornix ( $p = 0.0121$ ) have significantly reduced FA in cases compared to controls. Box  
 342 plots for these tracts are shown in Figure 9.

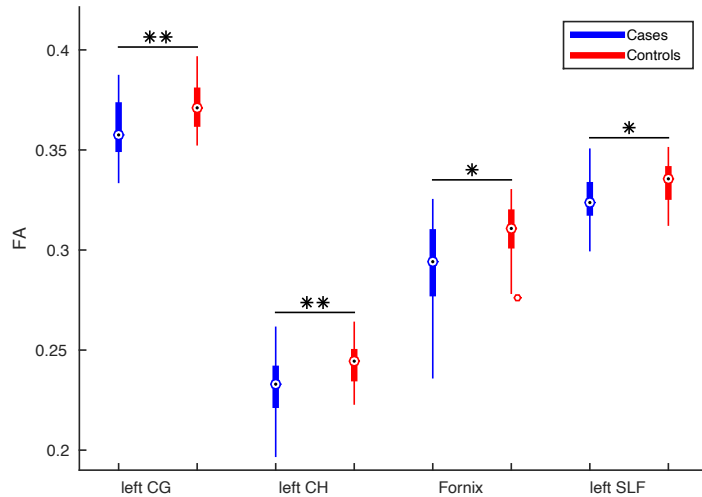

343

344 **Figure 9:** Box plots of significant differences in whole-tract average FA between children treated  
345 with TH for NE and healthy controls. \* $p < 0.05$  \*\* $p < 0.01$ , Bonferroni corrected.

346 The same analysis was run with the JHU atlas for comparison (see Table S4). Three tracts which were  
347 significant before Bonferroni correction when measured using the age-specific atlas, were not  
348 significant with the JHU atlas. Additionally, the left SLF, which was significant after correction when  
349 measured with the age-specific atlas, did not survive correction when measured with the JHU atlas.  
350 The left CG was significant with both atlases after correction; however, the p-value was lower when  
351 measured with the age-specific atlas. The left CH was significant after correction when measured with  
352 both atlases and was slightly more significant when measured with the JHU atlas. The right CH was  
353 significant after correction when measured with the JHU atlas but not the age-specific atlas. The  
354 fornix was significant when measured with the age-specific atlas but is not available in the JHU atlas  
355 so could not be tested.

## 356 4 Discussion

357 This study introduces an age-specific probabilistic white matter atlas constructed from children aged  
358 6-8 years, providing a method of delineating white matter tracts in younger cohorts who may be  
359 averse to the long scanning times required for tractography based on HARDI data. We have shown  
360 that this atlas accurately delineates tracts in children from a same-site cohort aged 6-8 years, and a  
361 cohort from a different site, imaged with different scanner and acquisition protocol, aged 8-9 years.  
362 The strong correlation between FA sampled by the atlas and that measured in each individual (i.e. the  
363 “gold-standard”), at both a whole-tract level and slice-wise level, shows that the atlas provides an  
364 accurate estimate for the underlying white matter microstructure. Additionally, the high Dice scores  
365 between tracts in the age-specific atlas and those delineated by tractography in each validation

366 individual demonstrate a high level of volumetric overlap (indicating improved anatomical accuracy  
367 of the age-specific atlas). In both measures of validation, the age-specific atlas almost always  
368 performs better than simply registering to an existing adult white matter tract atlas, as is routinely  
369 done in the literature. As proof of concept, we applied the age-specific atlas to the CoolMRI study,  
370 revealing significantly reduced FA in several major white matter tracts in children treated with TH for  
371 NE at birth compared to healthy controls.

372 The correlation of whole-tract FA measured by the atlas with that given by individual tracing offers  
373 quantification of the performance of the atlas as a whole. In both the same-site validation data and the  
374 ABIDE validation data, the age-specific atlas exhibits stronger correlation with the individual  
375 measurements, with the slope of the regression closer to unity, than for the JHU atlas. The narrower  
376 limits of agreement in the Bland-Altman plots and higher correlation coefficient for the age-specific  
377 atlas indicate that this has higher precision than the JHU atlas. The strong correlation and high  
378 precision of diffusion metrics sampled by the age-specific atlas shows that this can characterise the  
379 distribution of tract-level diffusion metrics in a study group, facilitating more sensitive group  
380 comparison and investigation of associations between these metrics and neuropsychological and  
381 behavioural measures.

382 Those tracts which exhibit a lower correlation between atlas and individual slice-wise FA  
383 measurements (namely the CG, SLF and SLFt, as well as the CH and UF in the ABIDE data) have  
384 very little spread in FA values, resulting in tightly grouped measurements with a low correlation  
385 coefficient, as shown in Figures 6 and S3. For these tracts, the Dice scores in Figures 5, as well as the  
386 tract-wise validation in Figures 7 and 8 demonstrate improved performance of the age-specific atlas  
387 on the level of whole tracts.

388 Long, thin tracts, such as the CST, IFOF and ILF, are particularly susceptible to partial volume effects  
389 when measuring overlap; a small radial translation will result in a large change to the Dice score. In  
390 these tracts, the high correlation in sampled FA values shows that the age-specific atlas gives accurate  
391 measurement of the tract microstructure.

392 Multi-site validation alleviates bias associated with using the same scanner for validation data and  
393 atlas construction. The age range of the ABIDE validation data is slightly higher than that of the atlas  
394 data, simply due to data availability, however the age-specific atlas still performs better than that  
395 obtained from adults i.e. the JHU atlas. Further bias may be introduced by the use of the same  
396 tractography algorithm in atlas creation and the same-site validation data, thus a different tractography  
397 algorithm was used for the ABIDE data, such that the results and conclusions drawn from them are  
398 deliberately conservative. Whereas the FOD-based algorithm used to construct the age-specific atlas  
399 uses spherical deconvolution to find the peak FOD in the closest orientation to the propagating

400 streamline, the tensor-based algorithm used for the ABIDE data propagates the streamline along the  
401 principal eigenvector of the diffusion tensor at each step, similar to the tensor-based fibre tracking  
402 algorithm used in the construction of the JHU atlas. Despite this bias towards the JHU atlas, the age-  
403 specific atlas still performed better overall in the ABIDE validation.

404 This introduces the question of how to provide the “gold-standard” of fibre tracking; the tensor-based  
405 algorithm was used for the ABIDE data in order to eliminate bias towards the age-specific atlas,  
406 however this category of fibre tracking algorithm is widely acknowledged to give poor  
407 characterisation of diffusion in brain white matter due to its inability to resolve crossing fibres  
408 (Behrens et al., 2007; Tournier et al., 2012). Thus, the FOD-based algorithm used in the construction  
409 of the atlas and in the same-site validation data, which facilitates more comprehensive tracing due to  
410 its superior performance in regions of crossing fibres (Tournier et al., 2008), arguably gives a more  
411 accurate representation of the ground truth (i.e. the underlying white matter fibres). Therefore, when  
412 inspecting the volumetric overlap between the atlas and individually traced tracts in the validation  
413 data, the same-site data traced with the FOD-based algorithm likely gives a better indication of  
414 performance overall. Consequently, we believe the ABIDE validation provides a worst-case  
415 performance estimate – the fibre tracking algorithm is comparable to the JHU atlas and the age range  
416 is above that of the age-specific atlas – yet the age-specific atlas still out-performs the adult JHU atlas.

417 In future, as well as providing coverage of other age ranges, atlases could offer more extensive  
418 labelling of additional tracts and regions of white matter. A comprehensive database of traced tracts  
419 across a range of ages, potentially constructed by applying automated tractography-based white  
420 matter tract segmentation protocols (Lawes et al., 2008; Verhoeven et al., 2009; Wassermann et al.,  
421 2010; Zhang et al., 2018) to data from population studies such as the Human Connectome Project  
422 (Van Essen et al., 2013), Developing Human Connectome Project (Hughes et al., 2017), or Baby  
423 Connectome Project (Howell et al., 2019), would allow study-specific atlases to be built from subjects  
424 matched to a given study cohort.

425 Applying the age-specific atlas to the CoolMRI study to investigate group differences in tract-level  
426 FA revealed selective reduction in FA, that was significantly reduced in the left CG, left CH, left SLF  
427 and the fornix. The differences in the left CG were more significant when measured with the age-  
428 specific atlas than with the JHU atlas, and the differences in the left SLF are only significant with the  
429 age-specific atlas. Additionally, several tracts which are significant before Bonferroni correction  
430 when measured with the age-specific atlas are not significant with the JHU atlas. These results may  
431 indicate improved sensitivity of the age-specific atlas facilitating more accurate measurements of the  
432 distribution of FA values in each group. Differences in the right CH were significant when measured  
433 with the JHU but not the age-specific atlas. The improved performance of the age-specific atlas in the

434 volumetric overlap and slice-wise correlation of the CH suggests that this may be a false positive  
435 when measured with the JHU atlas. This comparison between the group differences revealed by each  
436 atlas highlights the benefits of improved sensitivity when applying the atlas to a patient cohort.  
437 However, it is important to recognise that in the absence of “ground truth” these comparisons are  
438 qualitative in nature, and do not provide definitive evidence to support the use of one atlas over  
439 another.

440 Previous studies of neonates treated with TH for NE have investigated the relationship between white  
441 matter diffusion properties, measured in the first weeks following birth, and neurodevelopmental  
442 outcome at 2 years of age. These studies found a significant reduction in FA in infants with adverse  
443 outcomes, compared to those with favourable outcomes, in widespread areas of white matter  
444 including, but not limited to the corpus callosum, anterior and posterior limbs of the internal capsule,  
445 external capsule, fornix, cingulum, and ILF (Lally et al., 2019; Tusor et al., 2012). Many of these  
446 regions were also shown to have reduced FA in the CoolMRI cases, indicating that the early structural  
447 alterations resulting from the brain injury cause lasting changes to white matter development. These  
448 results also provide evidence for an underlying white matter deficit which manifests as  
449 neuropsychological differences seen at school-age (Jary et al., 2019; Lee-Kelland et al., 2020; Tonks  
450 et al., 2019). Further investigation is required to link these structural impairments to specific  
451 components of the cognitive and motor assessments, and to develop possible therapeutic intervention  
452 strategies.

## 453 **5 Conclusions**

454 The age-specific atlas provided by this study has been shown to robustly delineate white matter tracts  
455 in children aged 6-8 years. Diffusion metrics sampled by the atlas correlate strongly with those  
456 measured by individual fibre tracking, allowing reliable investigation of white matter microstructure  
457 in cohorts where running tractography in every individual may not be an option.

## 458 **Acknowledgements**

459 We thank the children and their families for participating, Jade Thai for the assistance with MR  
460 sequences, Aileen Wilson for her radiographical expertise, and James Tonks, Charlotte Whitfield and  
461 Emily Broadbridge for their assistance with neuropsychological assessment.

## 462 **Funding**

463 This work was supported by the Baily Thomas Charitable Fund [grant number  
464 TRUST/VC/AC/SG4681-7596]. AS is supported by the Wellcome Trust [grant number

465 220070/Z/20/Z]. JCWB is supported by the UK Medical Research Council [grant number  
466 MR/N026969/1]. Funding sources had no role in study design; in the collection, analysis and  
467 interpretation of data; in the writing of the report; and in the decision to submit the article for  
468 publication.

## 469 **References**

- 470 Altay, M., Holland, S.K., Wilke, M., Gaser, C., 2008. Infant brain probability templates for MRI segmentation and  
471 normalization. *Neuroimage* 43, 721–730. <https://doi.org/10.1016/J.NEUROIMAGE.2008.07.060>
- 472 Altman, D.G., Bland, J.M., 1983. Measurement in Medicine: The Analysis of Method Comparison Studies. *Stat.* 32, 307.  
473 <https://doi.org/10.2307/2987937>
- 474 Ameis, S.H., Catani, M., 2015. Altered white matter connectivity as a neural substrate for social impairment in Autism  
475 Spectrum Disorder. *Cortex* 62, 158–181. <https://doi.org/10.1016/j.cortex.2014.10.014>
- 476 Andersson, J.L.R., Jenkinson, M., Smith, S., 2007. Non-linear registration aka spatial normalisation [WWW Document].  
477 FMRIB Tech. Rep. TRO7JA2. URL <http://fmrib.medsci.ox.ac.uk/analysis/techrep/tr07ja2/tr07ja2.pdf>
- 478 Andersson, J.L.R., Skare, S., Ashburner, J., 2003. How to correct susceptibility distortions in spin-echo echo-planar images:  
479 application to diffusion tensor imaging. *Neuroimage* 20, 870–888. [https://doi.org/10.1016/S1053-8119\(03\)00336-7](https://doi.org/10.1016/S1053-8119(03)00336-7)
- 480 Andersson, J.L.R., Sotiropoulos, S.N., 2016. An integrated approach to correction for off-resonance effects and subject  
481 movement in diffusion MR imaging. *Neuroimage* 125, 1063–1078.  
482 <https://doi.org/10.1016/J.NEUROIMAGE.2015.10.019>
- 483 Arrigoni, F., Peruzzo, D., Gagliardi, C., Maghini, C., Colombo, P., Iammarrone, F.S., Pierpaoli, C., Triulzi, F., Turconi,  
484 A.C., 2016. Whole-Brain DTI Assessment of White Matter Damage in Children with Bilateral Cerebral Palsy:  
485 Evidence of Involvement beyond the Primary Target of the Anoxic Insult. *Am. J. Neuroradiol.* 37, 1347–1353.  
486 <https://doi.org/10.3174/ajnr.A4717>
- 487 Asato, M.R., Terwilliger, R., Woo, J., Luna, B., 2010. White matter development in adolescence: A DTI study. *Cereb.*  
488 *Cortex* 20, 2122–2131. <https://doi.org/10.1093/cercor/bhp282>
- 489 Assaf, Y., Johansen-Berg, H., Thiebaut de Schotten, M., 2019. The role of diffusion MRI in neuroscience. *NMR Biomed.*  
490 32, e3762. <https://doi.org/10.1002/nbm.3762>
- 491 Assaf, Y., Pasternak, O., 2008. Diffusion Tensor Imaging (DTI)-based White Matter Mapping in Brain Research: A Review.  
492 *J. Mol. Neurosci.* 34, 51–61. <https://doi.org/10.1007/s12031-007-0029-0>
- 493 Basser, P.J., Pajevic, S., Pierpaoli, C., Duda, J., Aldroubi, A., 2000. In vivo fiber tractography using DT-MRI data. *Magn.*  
494 *Reson. Med.* 44, 625–632. [https://doi.org/10.1002/1522-2594\(200010\)44:4<625::AID-MRM17>3.0.CO;2-O](https://doi.org/10.1002/1522-2594(200010)44:4<625::AID-MRM17>3.0.CO;2-O)
- 495 Bastiani, M., Andersson, J.L.R., Cordero-Grande, L., Murgasova, M., Hutter, J., Price, A.N., Makropoulos, A., Fitzgibbon,  
496 S.P., Hughes, E., Rueckert, D., Victor, S., Rutherford, M., Edwards, A.D., Smith, S.M., Tournier, J.-D., Hajnal, J. V.,  
497 Jbabdi, S., Sotiropoulos, S.N., 2019. Automated processing pipeline for neonatal diffusion MRI in the developing  
498 Human Connectome Project. *Neuroimage* 185, 750–763. <https://doi.org/10.1016/J.NEUROIMAGE.2018.05.064>
- 499 Behrens, T.E.J., Berg, H.J., Jbabdi, S., Rushworth, M.F.S., Woolrich, M.W., 2007. Probabilistic diffusion tractography with  
500 multiple fibre orientations: What can we gain? *Neuroimage* 34, 144–155.  
501 <https://doi.org/10.1016/J.NEUROIMAGE.2006.09.018>

- 502 Cascio, C.J., Gerig, G., Piven, J., 2007. Diffusion tensor imaging: Application to the study of the developing brain. *J. Am.*  
503 *Acad. Child Adolesc. Psychiatry* 46, 213–223. <https://doi.org/10.1097/01.chi.0000246064.93200.e8>
- 504 Dennis, E.L., Thompson, P.M., 2013. Typical and atypical brain development: a review of neuroimaging studies. *Dialogues*  
505 *Clin. Neurosci.* 15, 359–84.
- 506 Di Martino, A., O'Connor, D., Chen, B., Alaerts, K., Anderson, J.S., Assaf, M., Balsters, J.H., Baxter, L., Beggiano, A.,  
507 Bernaerts, S., Blanken, L.M.E., Bookheimer, S.Y., Braden, B.B., Byrge, L., Castellanos, F.X., Dapretto, M., Delorme,  
508 R., Fair, D.A., Fishman, I., Fitzgerald, J., Gallagher, L., Keehn, R.J.J., Kennedy, D.P., Lainhart, J.E., Luna, B.,  
509 Mostofsky, S.H., Müller, R.-A., Nebel, M.B., Nigg, J.T., O'Hearn, K., Solomon, M., Toro, R., Vaidya, C.J.,  
510 Wenderoth, N., White, T., Craddock, R.C., Lord, C., Leventhal, B., Milham, M.P., 2017. Enhancing studies of the  
511 connectome in autism using the autism brain imaging data exchange II. *Sci. Data* 4, 170010.  
512 <https://doi.org/10.1038/sdata.2017.10>
- 513 Dice, L.R., 1945. Measures of the Amount of Ecologic Association Between Species. *Ecology* 26, 297–302.  
514 <https://doi.org/10.2307/1932409>
- 515 Dimond, D., Schuetze, M., Smith, R.E., Dhollander, T., Cho, I., Vinette, S., Ten Eycke, K., Lebel, C., McCrimmon, A.,  
516 Dewey, D., Connelly, A., Bray, S., 2019. Reduced White Matter Fiber Density in Autism Spectrum Disorder. *Cereb.*  
517 *Cortex* 29, 1778–1788. <https://doi.org/10.1093/cercor/bhy348>
- 518 Fonov, V., Evans, A.C., Botteron, K., Almlí, C.R., McKinstry, R.C., Collins, D.L., 2011. Unbiased average age-appropriate  
519 atlases for pediatric studies. *Neuroimage* 54, 313–327. <https://doi.org/10.1016/j.neuroimage.2010.07.033>
- 520 Griswold, M.A., Jakob, P.M., Heidemann, R.M., Nittka, M., Jellus, V., Wang, J., Kiefer, B., Haase, A., 2002. Generalized  
521 autocalibrating partially parallel acquisitions (GRAPPA). *Magn. Reson. Med.* 47, 1202–1210.  
522 <https://doi.org/10.1002/mrm.10171>
- 523 Haggmann, P., Sporns, O., Madan, N., Cammoun, L., Pienaar, R., Wedeen, V.J., Meuli, R., Thiran, J.-P., Grant, P.E., 2010.  
524 White matter maturation reshapes structural connectivity in the late developing human brain. *Proc. Natl. Acad. Sci.*  
525 107, 19067–19072. <https://doi.org/10.1073/pnas.1009073107>
- 526 Horsfield, M.A., Jones, D.K., 2002. Applications of diffusion-weighted and diffusion tensor MRI to white matter diseases - a  
527 review. *NMR Biomed.* 15, 570–577. <https://doi.org/10.1002/nbm.787>
- 528 Howell, B.R., Styner, M.A., Gao, W., Yap, P.-T., Wang, L., Baluyot, K., Yacoub, E., Chen, G., Potts, T., Salzwedel, A., Li,  
529 G., Gilmore, J.H., Piven, J., Smith, J.K., Shen, D., Ugurbil, K., Zhu, H., Lin, W., Elison, J.T., 2019. The UNC/UMN  
530 Baby Connectome Project (BCP): An overview of the study design and protocol development. *Neuroimage* 185, 891–  
531 905. <https://doi.org/10.1016/J.NEUROIMAGE.2018.03.049>
- 532 Hua, K., Zhang, J., Wakana, S., Jiang, H., Li, X., Reich, D.S., Calabresi, P.A., Pekar, J.J., van Zijl, P.C.M., Mori, S., 2008.  
533 Tract probability maps in stereotaxic spaces: Analyses of white matter anatomy and tract-specific quantification.  
534 *Neuroimage* 39, 336–347. <https://doi.org/10.1016/j.neuroimage.2007.07.053>
- 535 Hughes, E.J., Winchman, T., Padormo, F., Teixeira, R., Wurie, J., Sharma, M., Fox, M., Hutter, J., Cordero-Grande, L.,  
536 Price, A.N., Allsop, J., Bueno-Conde, J., Tusor, N., Arichi, T., Edwards, A.D., Rutherford, M.A., Counsell, S.J.,  
537 Hajnal, J. V., 2017. A dedicated neonatal brain imaging system. *Magn. Reson. Med.* 78, 794–804.  
538 <https://doi.org/10.1002/mrm.26462>
- 539 Hüppi, P.S., Dubois, J., 2006. Diffusion tensor imaging of brain development. *Semin. Fetal Neonatal Med.* 11, 489–497.  
540 <https://doi.org/10.1016/j.siny.2006.07.006>
- 541 Jary, S., Lee-Kelland, R., Tonks, J., Cowan, F.M., Thoresen, M., Chakkarapani, E., 2019. Motor performance and cognitive  
542 correlates in children cooled for neonatal encephalopathy without cerebral palsy at school age. *Acta Paediatr. Int. J.*

- 543 Paediatr. 108, 1773–1780. <https://doi.org/10.1111/apa.14780>
- 544 Jenkinson, M., Bannister, P., Brady, M., Smith, S., 2002. Improved Optimization for the Robust and Accurate Linear  
545 Registration and Motion Correction of Brain Images. *Neuroimage* 17, 825–841.  
546 <https://doi.org/10.1006/NIMG.2002.1132>
- 547 Konrad, K., Eickhoff, S.B., 2010. Is the ADHD brain wired differently? A review on structural and functional connectivity  
548 in attention deficit hyperactivity disorder. *Hum. Brain Mapp.* 31, 904–916. <https://doi.org/10.1002/hbm.21058>
- 549 Lally, P.J., Montaldo, P., Oliveira, V., Soe, A., Swamy, R., Bassett, P., Mendoza, J., Atreja, G., Kariholu, U., Pattnayak, S.,  
550 Sashikumar, P., Harizaj, H., Mitchell, M., Ganesh, V., Harigopal, Sundeep, Dixon, J., English, P., Clarke, P.,  
551 Muthukumar, P., Satodia, P., Wayte, S., Abernethy, L.J., Yajamanyam, K., Bainbridge, A., Price, D., Huertas, A.,  
552 Sharp, D.J., Kalra, V., Chawla, S., Shankaran, S., Thayyil, S., Lally, P.J., Montaldo, P., Oliveira, V., Soe, A., Swamy,  
553 R., Bassett, P., Mendoza, J., Atreja, G., Kariholu, U., Pattnayak, S., Sashikumar, P., Harizaj, H., Mitchell, M., Ganesh,  
554 V., Harigopal, Sundeep, Dixon, J., English, P., Clarke, P., Muthukumar, P., Satodia, P., Wayte, S., Abernethy, L.J.,  
555 Yajamanyam, K., Bainbridge, A., Price, D., Huertas, A., Sharp, D.J., Kalra, V., Chawla, S., Shankaran, S., Thayyil,  
556 S., 2019. Magnetic resonance spectroscopy assessment of brain injury after moderate hypothermia in neonatal  
557 encephalopathy: a prospective multicentre cohort study. *Lancet Neurol.* 18, 35–45. [https://doi.org/10.1016/S1474-4422\(18\)30325-9](https://doi.org/10.1016/S1474-4422(18)30325-9)
- 559 Lawes, I.N.C., Barrick, T.R., Murugam, V., Spierings, N., Evans, D.R., Song, M., Clark, C.A., 2008. Atlas-based  
560 segmentation of white matter tracts of the human brain using diffusion tensor tractography and comparison with  
561 classical dissection. *Neuroimage* 39, 62–79. <https://doi.org/10.1016/J.NEUROIMAGE.2007.06.041>
- 562 Lebel, C., Treit, S., Beaulieu, C., 2019. A review of diffusion MRI of typical white matter development from early  
563 childhood to young adulthood. *NMR Biomed.* 32, e3778. <https://doi.org/10.1002/nbm.3778>
- 564 Lebel, C., Walker, L., Leemans, A., Phillips, L., Beaulieu, C., 2008. Microstructural maturation of the human brain from  
565 childhood to adulthood. *Neuroimage* 40, 1044–1055. <https://doi.org/10.1016/j.neuroimage.2007.12.053>
- 566 Lee-Kelland, R., Jary, S., Tonks, J., Cowan, F.M., Thoresen, M., Chakkarapani, E., 2020. School-age outcomes of children  
567 without cerebral palsy cooled for neonatal hypoxic–ischaemic encephalopathy in 2008–2010. *Arch. Dis. Child. - Fetal Neonatal Ed.* 105, 8–13. <https://doi.org/10.1136/archdischild-2018-316509>
- 569 Moeller, S., Yacoub, E., Olman, C.A., Auerbach, E., Strupp, J., Harel, N., Uğurbil, K., 2010. Multiband multislice GE-EPI  
570 at 7 tesla, with 16-fold acceleration using partial parallel imaging with application to high spatial and temporal whole-  
571 brain fMRI. *Magn. Reson. Med.* 63, 1144–1153. <https://doi.org/10.1002/mrm.22361>
- 572 Phan, T.V., Smeets, D., Talcott, J.B., Vandermosten, M., 2018. Processing of structural neuroimaging data in young  
573 children: Bridging the gap between current practice and state-of-the-art methods. *Dev. Cogn. Neurosci.* 33, 206–223.  
574 <https://doi.org/10.1016/j.dcn.2017.08.009>
- 575 Richards, J.E., Sanchez, C., Phillips-Meek, M., Xie, W., 2016. A database of age-appropriate average MRI templates.  
576 *Neuroimage* 124, 1254–1259. <https://doi.org/10.1016/J.NEUROIMAGE.2015.04.055>
- 577 Sanchez, C.E., Richards, J.E., Almlí, C.R., 2012. Age-specific MRI templates for pediatric neuroimaging. *Dev.*  
578 *Neuropsychol.* 37, 379–399. <https://doi.org/10.1080/87565641.2012.688900>
- 579 Setsompop, K., Cohen-Adad, J., Gagoski, B.A., Raij, T., Yendiki, A., Keil, B., Wedeen, V.J., Wald, L.L., 2012a. Improving  
580 diffusion MRI using simultaneous multi-slice echo planar imaging. *Neuroimage* 63, 569–580.  
581 <https://doi.org/10.1016/j.neuroimage.2012.06.033>
- 582 Setsompop, K., Gagoski, B.A., Polimeni, J.R., Witzel, T., Wedeen, V.J., Wald, L.L., 2012b. Blipped-controlled aliasing in  
583 parallel imaging for simultaneous multislice echo planar imaging with reduced g-factor penalty. *Magn. Reson. Med.*



- 584 67, 1210–1224. <https://doi.org/10.1002/mrm.23097>
- 585 Simmonds, D.J., Hallquist, M.N., Asato, M., Luna, B., 2014. Developmental stages and sex differences of white matter and  
586 behavioral development through adolescence: A longitudinal diffusion tensor imaging (DTI) study. *Neuroimage* 92,  
587 356–368. <https://doi.org/10.1016/J.NEUROIMAGE.2013.12.044>
- 588 Smith, R.E., Tournier, J.-D., Calamante, F., Connelly, A., 2013. SIFT: Spherical-deconvolution informed filtering of  
589 tractograms. *Neuroimage* 67, 298–312. <https://doi.org/10.1016/j.neuroimage.2012.11.049>
- 590 Smith, S.M., Jenkinson, M., Woolrich, M.W., Beckmann, C.F., Behrens, T.E.J., Johansen-Berg, H., Bannister, P.R., De  
591 Luca, M., Drobnjak, I., Flitney, D.E., Niazy, R.K., Saunders, J., Vickers, J., Zhang, Y., De Stefano, N., Brady, J.M.,  
592 Matthews, P.M., 2004. Advances in functional and structural MR image analysis and implementation as FSL.  
593 *Neuroimage* 23, S208–S219. <https://doi.org/10.1016/J.NEUROIMAGE.2004.07.051>
- 594 Sydnor, V.J., Rivas-Grajales, A.M., Lyall, A.E., Zhang, F., Bouix, S., Karmacharya, S., Shenton, M.E., Westin, C.-F.,  
595 Makris, N., Wassermann, D., O'Donnell, L.J., Kubicki, M., 2018. A comparison of three fiber tract delineation  
596 methods and their impact on white matter analysis. *Neuroimage* 178, 318–331.  
597 <https://doi.org/10.1016/j.neuroimage.2018.05.044>
- 598 Tonks, J., Cloke, G., Lee-Kelland, R., Jary, S., Thoresen, M., Cowan, F.M., Chakkarapani, E., 2019. Attention and visuo-  
599 spatial function in children without cerebral palsy who were cooled for neonatal encephalopathy: a case-control study.  
600 *Brain Inj.* 33, 894–898. <https://doi.org/10.1080/02699052.2019.1597163>
- 601 Tournier, J.-D., Calamante, F., Connelly, A., 2013. Determination of the appropriate b value and number of gradient  
602 directions for high-angular-resolution diffusion-weighted imaging. *NMR Biomed.* 26, 1775–1786.  
603 <https://doi.org/10.1002/nbm.3017>
- 604 Tournier, J.-D., Calamante, F., Connelly, A., 2012. MRtrix: Diffusion tractography in crossing fiber regions. *Int. J. Imaging*  
605 *Syst. Technol.* 22, 53–66. <https://doi.org/10.1002/ima.22005>
- 606 Tournier, J.-D., Calamante, F., Connelly, A., 2007. Robust determination of the fibre orientation distribution in diffusion  
607 MRI: Non-negativity constrained super-resolved spherical deconvolution. *Neuroimage* 35, 1459–1472.  
608 <https://doi.org/10.1016/j.neuroimage.2007.02.016>
- 609 Tournier, J.-D., Smith, R., Raffelt, D., Tabbara, R., Dhollander, T., Pietsch, M., Christiaens, D., Jeurissen, B., Yeh, C.-H.,  
610 Connelly, A., 2019. MRtrix3: A fast, flexible and open software framework for medical image processing and  
611 visualisation. *Neuroimage* 202, 116137. <https://doi.org/10.1016/j.neuroimage.2019.116137>
- 612 Tournier, J.-D., Yeh, C.-H., Calamante, F., Cho, K.-H., Connelly, A., Lin, C.-P., 2008. Resolving crossing fibres using  
613 constrained spherical deconvolution: Validation using diffusion-weighted imaging phantom data. *Neuroimage* 42,  
614 617–625. <https://doi.org/10.1016/J.NEUROIMAGE.2008.05.002>
- 615 Tusor, N., Wusthoff, C., Smee, N., Merchant, N., Arichi, T., Allsop, J.M., Cowan, F.M., Azzopardi, D., Edwards, A.D.,  
616 Counsell, S.J., 2012. Prediction of neurodevelopmental outcome after hypoxic–ischemic encephalopathy treated with  
617 hypothermia by diffusion tensor imaging analyzed using tract-based spatial statistics. *Pediatr. Res.* 72, 63–69.  
618 <https://doi.org/10.1038/pr.2012.40>
- 619 Van Essen, D.C., Smith, S.M., Barch, D.M., Behrens, T.E.J., Yacoub, E., Ugurbil, K., 2013. The WU-Minn Human  
620 Connectome Project: An overview. *Neuroimage* 80, 62–79. <https://doi.org/10.1016/J.NEUROIMAGE.2013.05.041>
- 621 Verhoeven, J.S., Sage, C.A., Leemans, A., Van Hecke, W., Callaert, D., Peeters, R., De Cock, P., Lagae, L., Sunaert, S.,  
622 2009. Construction of a stereotaxic DTI atlas with full diffusion tensor information for studying white matter  
623 maturation from childhood to adolescence using tractography-based segmentations. *Hum. Brain Mapp.* NA-NA.  
624 <https://doi.org/10.1002/hbm.20880>

- 625 Wakana, S., Caprihan, A., Panzenboeck, M.M., Fallon, J.H., Perry, M., Gollub, R.L., Hua, K., Zhang, J., Jiang, H., Dubey,  
626 P., Blitz, A., van Zijl, P., Mori, S., 2007. Reproducibility of quantitative tractography methods applied to cerebral  
627 white matter. *Neuroimage* 36, 630–644. <https://doi.org/10.1016/j.neuroimage.2007.02.049>
- 628 Wassermann, D., Bloy, L., Kanterakis, E., Verma, R., Deriche, R., 2010. Unsupervised white matter fiber clustering and  
629 tract probability map generation: Applications of a Gaussian process framework for white matter fibers. *Neuroimage*  
630 51, 228–241. <https://doi.org/10.1016/J.NEUROIMAGE.2010.01.004>
- 631 Zhang, F., Wu, Y., Norton, I., Rigolo, L., Rathi, Y., Makris, N., O'Donnell, L.J., 2018. An anatomically curated fiber  
632 clustering white matter atlas for consistent white matter tract parcellation across the lifespan. *Neuroimage* 179, 429–  
633 447. <https://doi.org/10.1016/J.NEUROIMAGE.2018.06.027>
- 634
